# Supplementary material for: Self-illuminating quantum dots for non-invasive bioluminescence imaging of mammalian gametes
Source: PubMed Central journal article supplement (PMC4455054; doi:10.1186/s12951-015-0097-1), 2015-06-04

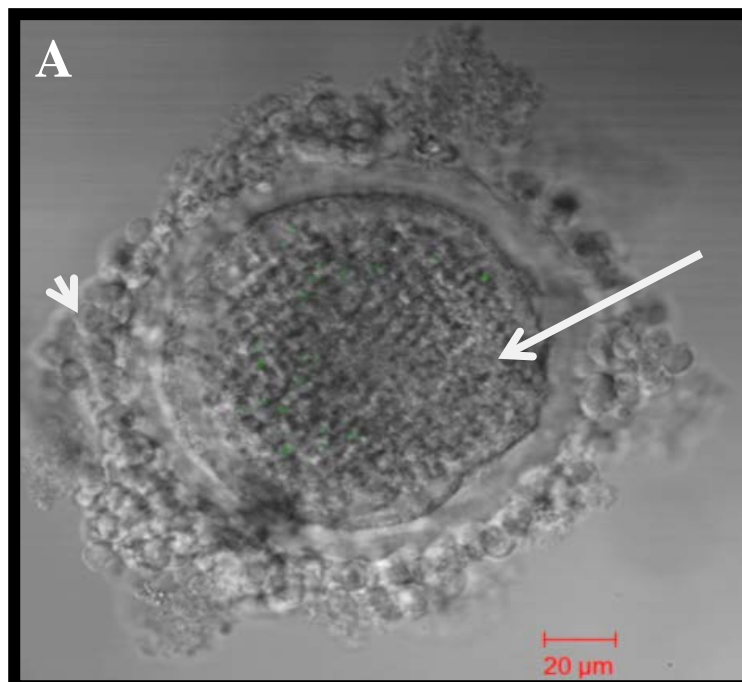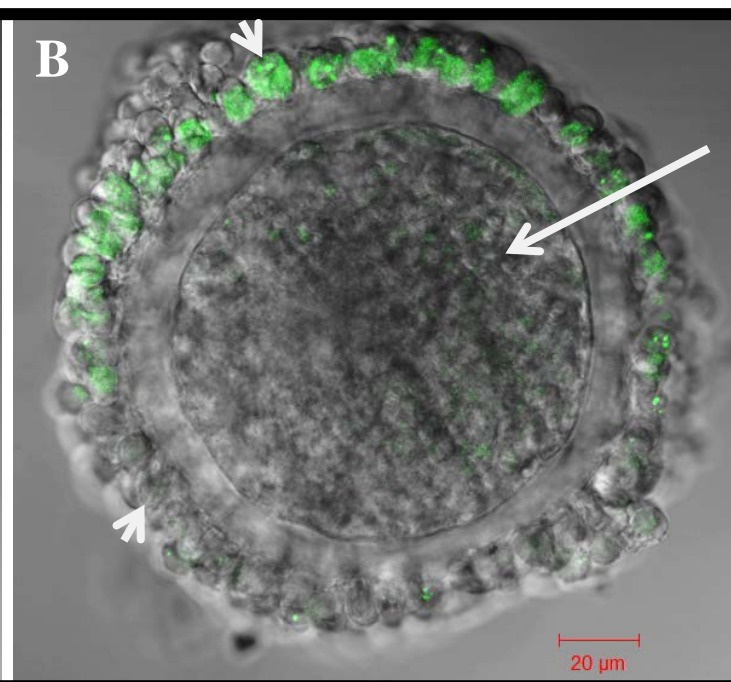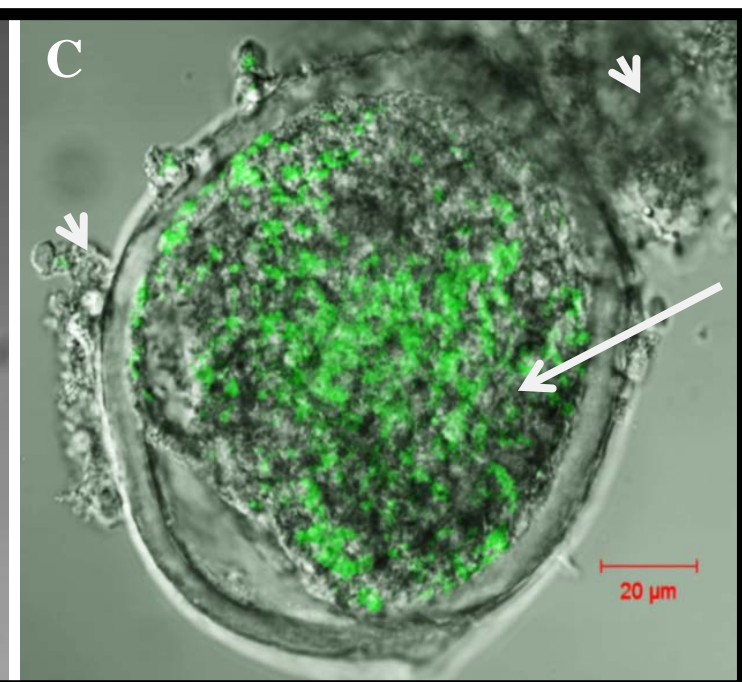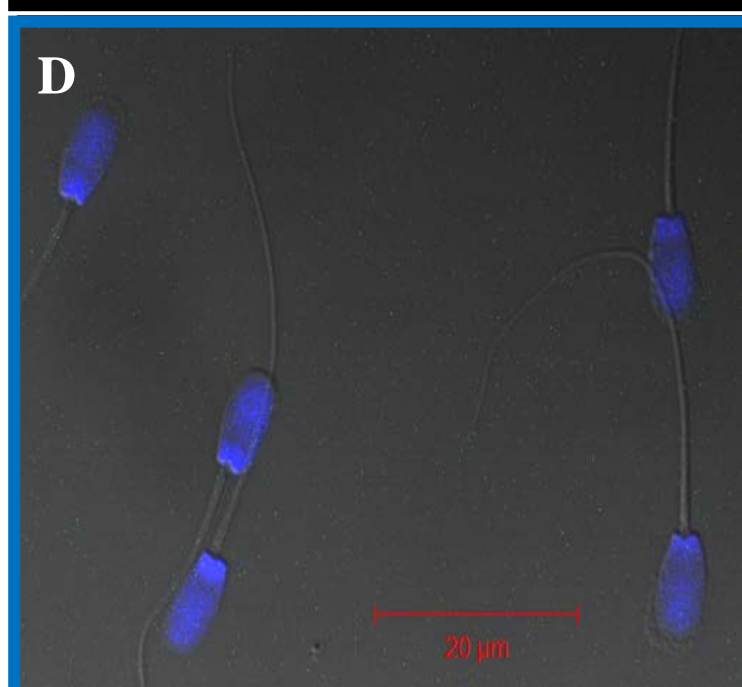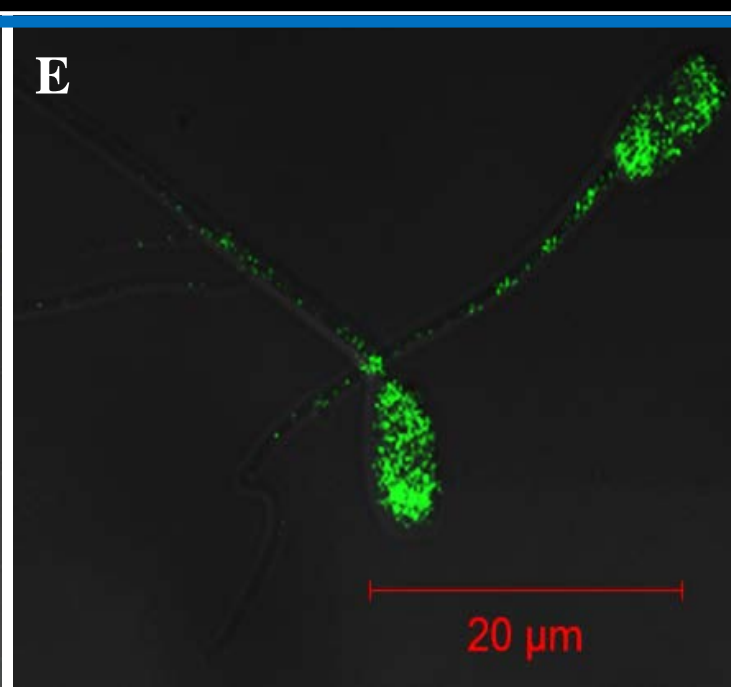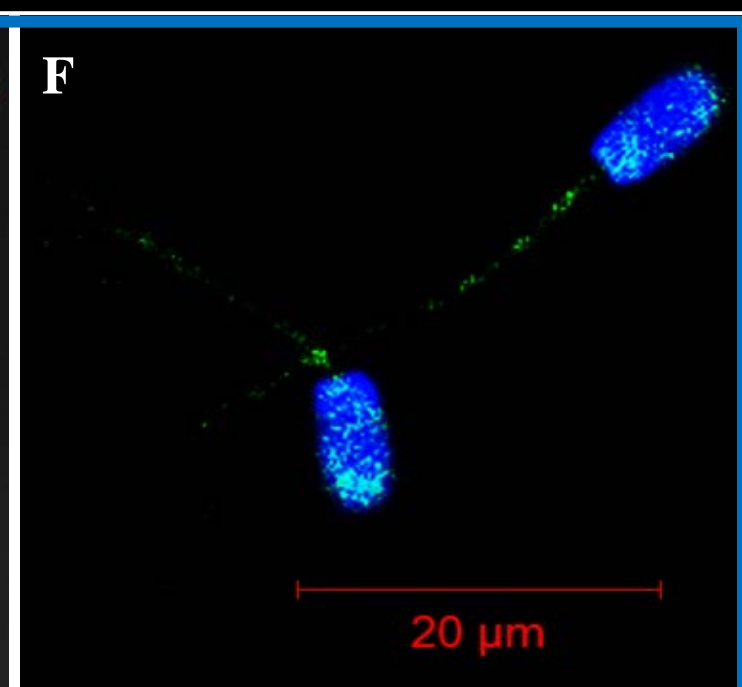

Supplement: 12951_2015_97_MOESM3_ESM.pdf [file 12951_2015_97_MOESM3_ESM.pdf]
